# Supplementary material
Source: PubMed Central journal article supplement (PMC6248126)
Supplement: jamadermatol-154-1320-s001.pdf [file jamadermatol-154-1320-s001.pdf]

## Supplementary Online Content

Khalil S, Bardawil T, Saade S, et al. Use of topical glycolic acid plus a lovastatin-cholesterol combination cream for the treatment of autosomal recessive congenital ichthyoses. *JAMA Dermatol*. Published online September 12, 2018. doi:10.1001/jamadermatol.2018.2904

**eFigure.** The cholesterol metabolic pathway and the cholesterol sulfate cycle

**eTable 1.** Scoring criteria

**eTable 2.** Baseline patient characteristics

**eTable 3.** Severity score before, 2 months and 3 months after treatment

**eTable 4.** Response in patients who applied the combination of statin with cholesterol on the right side of the body only

This supplementary material has been provided by the authors to give readers additional information about their work.

eFigure:

The cholesterol metabolic pathway and the cholesterol sulfate cycle: Synthesis of cholesterol starts with the condensation of two molecules of acetyl-CoA. The rate limiting step is catalyzed by HMG-CoA reductase, the enzyme targeted by statins. After being formed, cholesterol is sulfated by the enzyme cholesterol sulfotransferase (SULT2B1b) in the lower epidermis to form cholesterol sulfate. The latter is then de-sulfated by the enzyme steroid sulfatase (SSase) in the outer epidermis.

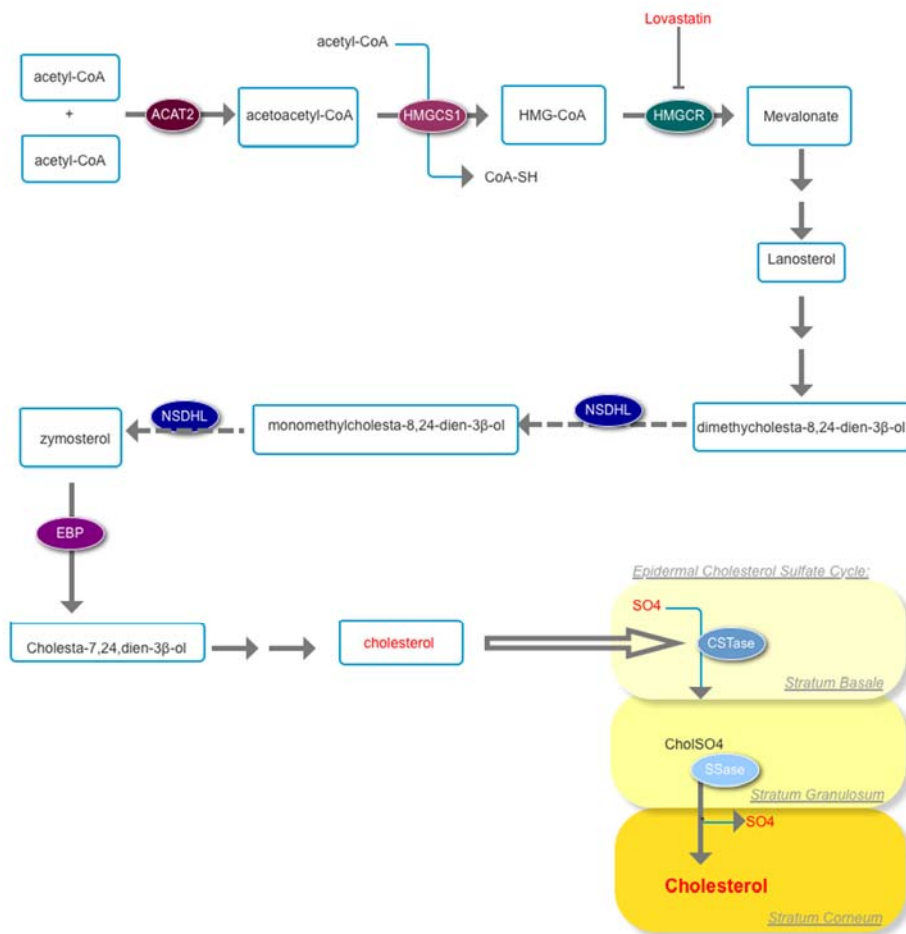

eTable 1: Scoring criteria

| <b>Criterion</b>                                                  | <b>Maximum Score</b> |
|-------------------------------------------------------------------|----------------------|
| Skin thickness/ scaling                                           | 20                   |
| Pain/ Pruritis/ Discomfort                                        | 20                   |
| Erythema                                                          | 20                   |
| Impact of the condition on the ability to perform daily functions | 20                   |
| Patient severity scoring                                          | 20                   |
| <b>Total score</b>                                                | <b>100</b>           |

eTable 2: Baseline patient characteristics

| <b>Patient ID</b> | <b>Gender</b> |
|-------------------|---------------|
| 1                 | male          |
| 2                 | male          |
| 3                 | male          |
| 4                 | female        |
| 5                 | female        |
| 6                 | male          |
| 7                 | male          |
| 8                 | male          |
| 9                 | male          |
| 10                | male          |
| 11                | female        |
| 12                | female        |
| 13                | male          |
| 14                | male          |
| 15                | female        |

eTable 3: Severity score before, 2 months and 3 months after treatment.

| ID                                 | 1  | 2  | 3  | 4  | 5  | 6  | 7  | 8  | 9  | 10 | 11 | 12 | 13 | 14 | 15 | Average | Standard deviation |
|------------------------------------|----|----|----|----|----|----|----|----|----|----|----|----|----|----|----|---------|--------------------|
| At Baseline                        |    |    |    |    |    |    |    |    |    |    |    |    |    |    |    |         |                    |
| Skin thickness/<br>scaling         | 15 | 12 | 7  | 13 | 6  | 17 | 14 | 15 | 13 | 16 | 14 | 14 | 17 | 18 | 15 |         |                    |
| Pain/<br>pruritis/<br>discharge    | 7  | 7  | 4  | 8  | 4  | 10 | 9  | 9  | 10 | 11 | 10 | 14 | 18 | 15 | 15 |         |                    |
| Erythema                           | 10 | 6  | 3  | 11 | 3  | 13 | 11 | 12 | 12 | 13 | 12 | 10 | 17 | 15 | 15 |         |                    |
| Ability to perform daily functions | 5  | 7  | 3  | 7  | 4  | 10 | 9  | 10 | 10 | 11 | 11 | 7  | 15 | 18 | 15 |         |                    |
| Patient severity scoring           | 18 | 17 | 10 | 16 | 18 | 18 | 15 | 16 | 15 | 17 | 16 | 18 | 20 | 19 | 17 |         |                    |
| Total score                        | 55 | 49 | 27 | 55 | 35 | 68 | 58 | 62 | 60 | 68 | 63 | 63 | 87 | 85 | 77 | 60.8    |                    |
|                                    |    |    |    |    |    |    |    |    |    |    |    |    |    |    |    |         |                    |
| At 2 months                        |    |    |    |    |    |    |    |    |    |    |    |    |    |    |    |         |                    |
| Skin                               | 15 | 9  | 7  | 7  | 2  | 15 | 7  | 7  | 6  | 7  | 6  | 11 | 14 | 14 | 11 |         |                    |

|                                                |                  |                  |                  |                  |                  |                  |                  |                  |                  |                  |                  |                  |                  |                  |                  |                   |                     |  |
|------------------------------------------------|------------------|------------------|------------------|------------------|------------------|------------------|------------------|------------------|------------------|------------------|------------------|------------------|------------------|------------------|------------------|-------------------|---------------------|--|
| thickness/<br>scaling                          |                  |                  |                  |                  |                  |                  |                  |                  |                  |                  |                  |                  |                  |                  |                  |                   |                     |  |
| Pain/<br>pruritis/<br>discharge                | 6                | 6                | 3                | 3                | 3                | 9                | 4                | 4                | 5                | 5                | 5                | 12               | 18               | 10               | 12               |                   |                     |  |
| Erythema                                       | 8                | 6                | 2                | 8                | 2                | 13               | 6                | 5                | 5                | 6                | 5                | 10               | 16               | 10               | 11               |                   |                     |  |
| Ability<br>to<br>perform<br>daily<br>functions | 5                | 5                | 3                | 3                | 1                | 10               | 4                | 4                | 4                | 6                | 6                | 5                | 13               | 8                | 10               |                   |                     |  |
| Patient<br>severity<br>scoring                 | 17               | 17               | 10               | 7                | 9                | 17               | 7                | 7                | 8                | 9                | 7                | 10               | 15               | 8                | 12               |                   |                     |  |
| Total<br>score                                 | 51               | 43               | 25               | 28               | 17               | 64               | 28               | 27               | 28               | 33               | 29               | 48               | 76               | 50               | 56               | 40.2              |                     |  |
| %<br>change                                    | -<br>7.272<br>73 | -<br>12.24<br>49 | -<br>7.407<br>41 | -<br>49.09<br>09 | -<br>51.42<br>86 | -<br>5.882<br>35 | -<br>51.72<br>41 | -<br>56.451<br>6 | -<br>53.33<br>33 | -<br>51.47<br>06 | -<br>53.968<br>3 | -<br>23.80<br>95 | -<br>12.64<br>37 | -<br>41.17<br>65 | -<br>27.27<br>27 | -<br>33.6784<br>8 | -<br>20.29775<br>89 |  |
| Response                                       | Mild             | Mild             | Mild             | Good             | Very good        | Mild             | Very Good        | Mild             | Mild             | Good             | Mild             | Mild              |                     |  |
| At 3<br>months                                 |                  |                  |                  |                  |                  |                  |                  |                  |                  |                  |                  |                  |                  |                  |                  |                   |                     |  |
| Skin<br>thickness/<br>s/                       | 8                | 5                | 3                | 5                | 4                | 15               | 4                | 2                | 3                | 4                | 2                | 8                | 10               | 12               | 9                |                   |                     |  |

|                                                |                  |                  |                  |                  |                  |                  |                  |                  |                  |                  |                  |                  |                 |                  |                  |                   |                    |  |
|------------------------------------------------|------------------|------------------|------------------|------------------|------------------|------------------|------------------|------------------|------------------|------------------|------------------|------------------|-----------------|------------------|------------------|-------------------|--------------------|--|
| scaling                                        |                  |                  |                  |                  |                  |                  |                  |                  |                  |                  |                  |                  |                 |                  |                  |                   |                    |  |
| Pain/<br>pruritis/<br>discharge                | 1                | 3                | 1                | 1                | 3                | 7                | 2                | 2                | 2                | 3                | 3                | 5                | 14              | 9                | 10               |                   |                    |  |
| Erythema                                       | 3                | 3                | 2                | 3                | 6                | 12               | 4                | 1                | 2                | 4                | 3                | 5                | 13              | 9                | 9                |                   |                    |  |
| Ability<br>to<br>perform<br>daily<br>functions | 2                | 2                | 1                | 2                | 3                | 10               | 2                | 1                | 3                | 4                | 2                | 2                | 7               | 5                | 7                |                   |                    |  |
| Patient<br>severity<br>scoring                 | 6                | 4                | 6                | 4                | 13               | 17               | 3                | 3                | 6                | 5                | 3                | 4                | 10              | 5                | 7                |                   |                    |  |
| Total<br>score                                 | 20               | 17               | 13               | 15               | 29               | 61               | 15               | 9                | 16               | 20               | 13               | 24               | 54              | 40               | 42               | 25.8666<br>67     |                    |  |
| %<br>change                                    | -<br>63.63<br>64 | -<br>65.30<br>61 | -<br>51.85<br>19 | -<br>72.72<br>73 | -<br>17.14<br>29 | -<br>10.29<br>41 | -<br>74.13<br>79 | -<br>85.483<br>9 | -<br>73.33<br>33 | -<br>70.58<br>82 | -<br>79.365<br>1 | -<br>61.90<br>48 | -<br>37.93<br>1 | -<br>52.94<br>12 | -<br>45.45<br>45 | -<br>57.4732<br>4 | -<br>21.95395<br>1 |  |
|                                                | Very<br>good     | Very<br>good     | Very<br>Good     | Very<br>good     | Mild             | Mild             | Very<br>good     | Excelle<br>nt    | Very<br>good     | Very<br>good     | Excelle<br>nt    | Very<br>good     | Good            | Very<br>good     | Good             | Very<br>Good      |                    |  |

eTable 4: Response in patients who applied the combination of statin with cholesterol on the right side of the body only

|                                                   | 1         |           | 2         |           | 3         |           | 4         |           | 6         |           |
|---------------------------------------------------|-----------|-----------|-----------|-----------|-----------|-----------|-----------|-----------|-----------|-----------|
| <b>At Baseline</b>                                | Left      | Right     |
| <b>Skin thickness/<br/>scaling</b>                | 15        | 15        | 12        | 12        | 7         | 7         | 13        | 13        | 17        | 17        |
| <b>Pain/ pruritis/<br/>discharge</b>              | 7         | 7         | 7         | 7         | 4         | 4         | 8         | 8         | 10        | 10        |
| <b>Erythema</b>                                   | 10        | 10        | 7         | 6         | 3         | 3         | 11        | 11        | 13        | 13        |
| <b>Ability to<br/>perform daily<br/>functions</b> | 5         | 5         | 7         | 7         | 3         | 3         | 7         | 7         | 10        | 10        |
| <b>Patient<br/>severity<br/>scoring</b>           | 18        | 18        | 17        | 17        | 10        | 10        | 16        | 16        | 18        | 18        |
| <b>Total score</b>                                | <b>55</b> | <b>55</b> | <b>50</b> | <b>49</b> | <b>27</b> | <b>27</b> | <b>55</b> | <b>55</b> | <b>68</b> | <b>68</b> |
| <b>At 2 months</b>                                |           |           |           |           |           |           |           |           |           |           |
| <b>Skin thickness/<br/>scaling</b>                | 15        | 15        | 10        | 8         | 7         | 7         | 8         | 7         | 15        | 16        |
| <b>Pain/ pruritis/<br/>discharge</b>              | 6         | 7         | 6         | 6         | 3         | 3         | 4         | 3         | 8         | 10        |
| <b>Erythema</b>                                   | 9         | 7         | 6         | 6         | 3         | 2         | 9         | 8         | 13        | 13        |
| <b>Ability to<br/>perform daily<br/>functions</b> | 5         | 5         | 5         | 5         | 3         | 3         | 3         | 3         | 10        | 10        |
| <b>Patient<br/>severity<br/>scoring</b>           | 17        | 17        | 17        | 17        | 10        | 10        | 8         | 6         | 17        | 17        |
| <b>Total score</b>                                | <b>52</b> | <b>51</b> | <b>44</b> | <b>42</b> | <b>26</b> | <b>25</b> | <b>32</b> | <b>27</b> | <b>63</b> | <b>66</b> |

|                                                                |           |                      |           |           |                      |                      |                     |                     |                      |                      |
|----------------------------------------------------------------|-----------|----------------------|-----------|-----------|----------------------|----------------------|---------------------|---------------------|----------------------|----------------------|
| <b>% change</b>                                                | -5.4545   | 7.27273 <sup>-</sup> | -12       | -14.2857  | -3.7037              | 7.40741 <sup>-</sup> | 41.818 <sup>-</sup> | 50.909 <sup>-</sup> | 7.35294 <sup>-</sup> | 2.94118 <sup>-</sup> |
| <b>Response</b>                                                | Mild      | Mild                 | Mild      | Mild      | Mild                 | Mild                 | Good                | Very Good           | Mild                 | Mild                 |
| <b>At 3 months</b>                                             |           |                      |           |           |                      |                      |                     |                     |                      |                      |
| <b>Skin thickness/<br/>scaling</b>                             | 9         | 7                    | 6         | 5         | 4                    | 2                    | 6                   | 5                   | 14                   | 16                   |
| <b>Pain/ pruritis/<br/>discharge</b>                           | 2         | 1                    | 4         | 2         | 2                    | 1                    | 2                   | 1                   | 7                    | 7                    |
| <b>Erythema</b>                                                | 4         | 3                    | 4         | 3         | 2                    | 2                    | 4                   | 3                   | 13                   | 12                   |
| <b>Ability to<br/>perform daily<br/>functions/ to<br/>move</b> | 2         | 2                    | 2         | 2         | 1                    | 1                    | 2                   | 2                   | 10                   | 10                   |
| <b>Patient<br/>severity<br/>scoring</b>                        | 8         | 5                    | 5         | 3         | 7                    | 5                    | 5                   | 3                   | 17                   | 17                   |
| <b>Total score</b>                                             | 25        | 18                   | 21        | 15        | 16                   | 11                   | 19                  | 14                  | 61                   | 62                   |
| <b>% change</b>                                                | -54.545   | 67.2727 <sup>-</sup> | -58       | -69.3878  | 40.7407 <sup>-</sup> | 59.2593 <sup>-</sup> | 65.455 <sup>-</sup> | 74.545 <sup>-</sup> | 10.2941 <sup>-</sup> | 8.82353 <sup>-</sup> |
| <b>Response</b>                                                | Very good | Very good            | Very good | Very good | Good                 | Very good            | Very good           | Very good           | Mild                 | Mild                 |
